# Supplementary material
Source: PubMed Central journal article supplement (PMC7978030)
Supplement: ryct200213suppa1.pdf [file ryct200213suppa1.pdf]

**Table E1. Weighted  $\kappa$  coefficients between pairs of readers using CO-RADS (23).**

| Reader pair                                       | $\kappa$ coefficient (95% CI) |
|---------------------------------------------------|-------------------------------|
| Chest radiologist 1-chest radiologist 2           | 0.773 (0.699–0.848)           |
| Chest radiologist 1-fifth-year radiology resident | 0.658 (0.557–0.759)           |
| Chest radiologist 2-fifth-year radiology resident | 0.648 (0.555–0.742)           |

## References

23. Prokop M, van Everdingen W, van Rees Vellinga T, et al. CO-RADS - A categorical CT assessment scheme for patients with suspected COVID-19: definition and evaluation. *Radiology* 2020. Published online April 27, 2020.
